# Supplementary material for: Differentiation of Cystic Fibrosis-Related Pathogens by Volatile Organic Compound Analysis with Secondary Electrospray Ionization Mass Spectrometry
Source: MDPI journal article supplement (doi:10.3390/metabo11110773), 2021-11-11
Supplement: s1 [file s1]

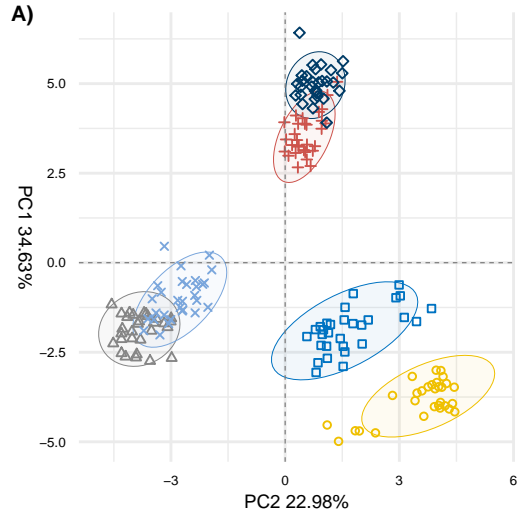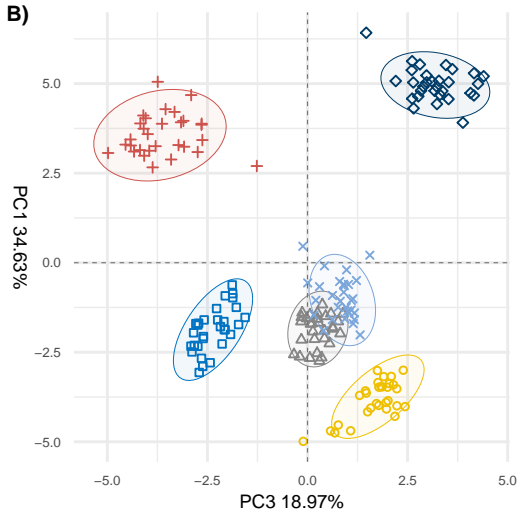

**C)**

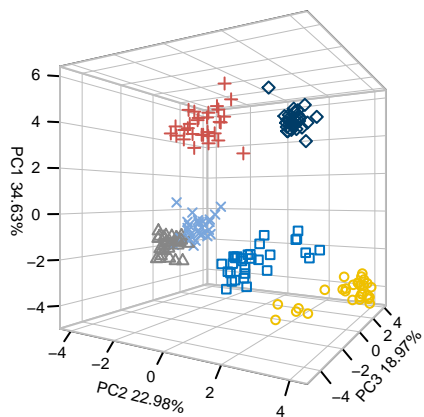

- *Escherichia coli*
- *Haemophilus influenzae*
- △ *Pseudomonas aeruginosa*
- ✚ *Staphylococcus aureus*
- ✕ *Stenotrophomonas maltophilia*
- ◇ *Streptococcus pneumoniae*
