# Supplementary material for: Differentiation of Cystic Fibrosis-Related Pathogens by Volatile Organic Compound Analysis with Secondary Electrospray Ionization Mass Spectrometry
Source: MDPI journal article supplement (doi:10.3390/metabo11110773), 2021-11-11

humidifier

headspace  
sampler

secondary electrospray  
ionization (SESI) source

time-of-flight  
mass spectrometer (TOFMS)

medical air  
0.2 l/min

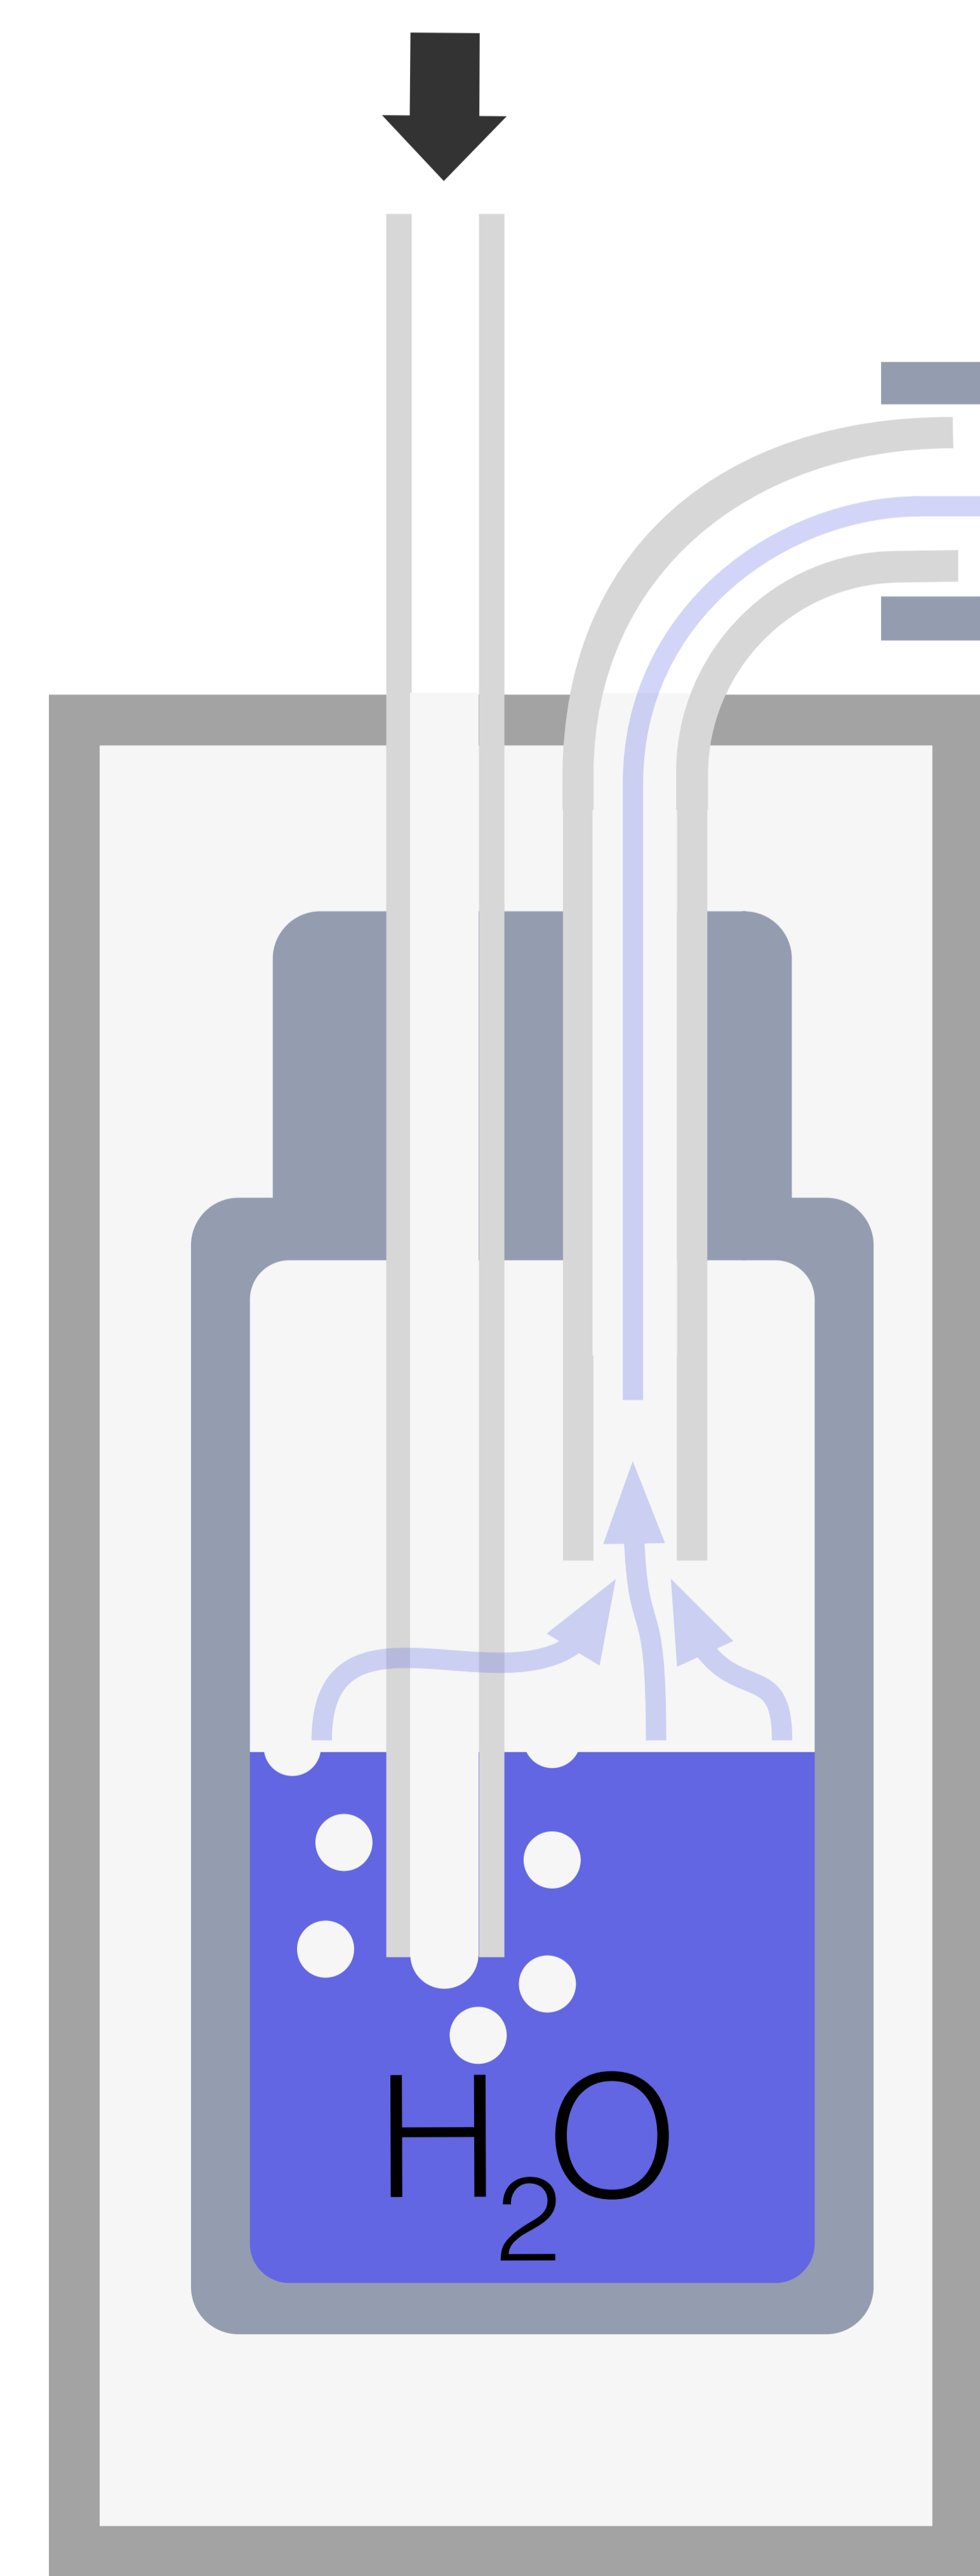

aluminum box  
at  $T=65\text{ }^{\circ}\text{C}$

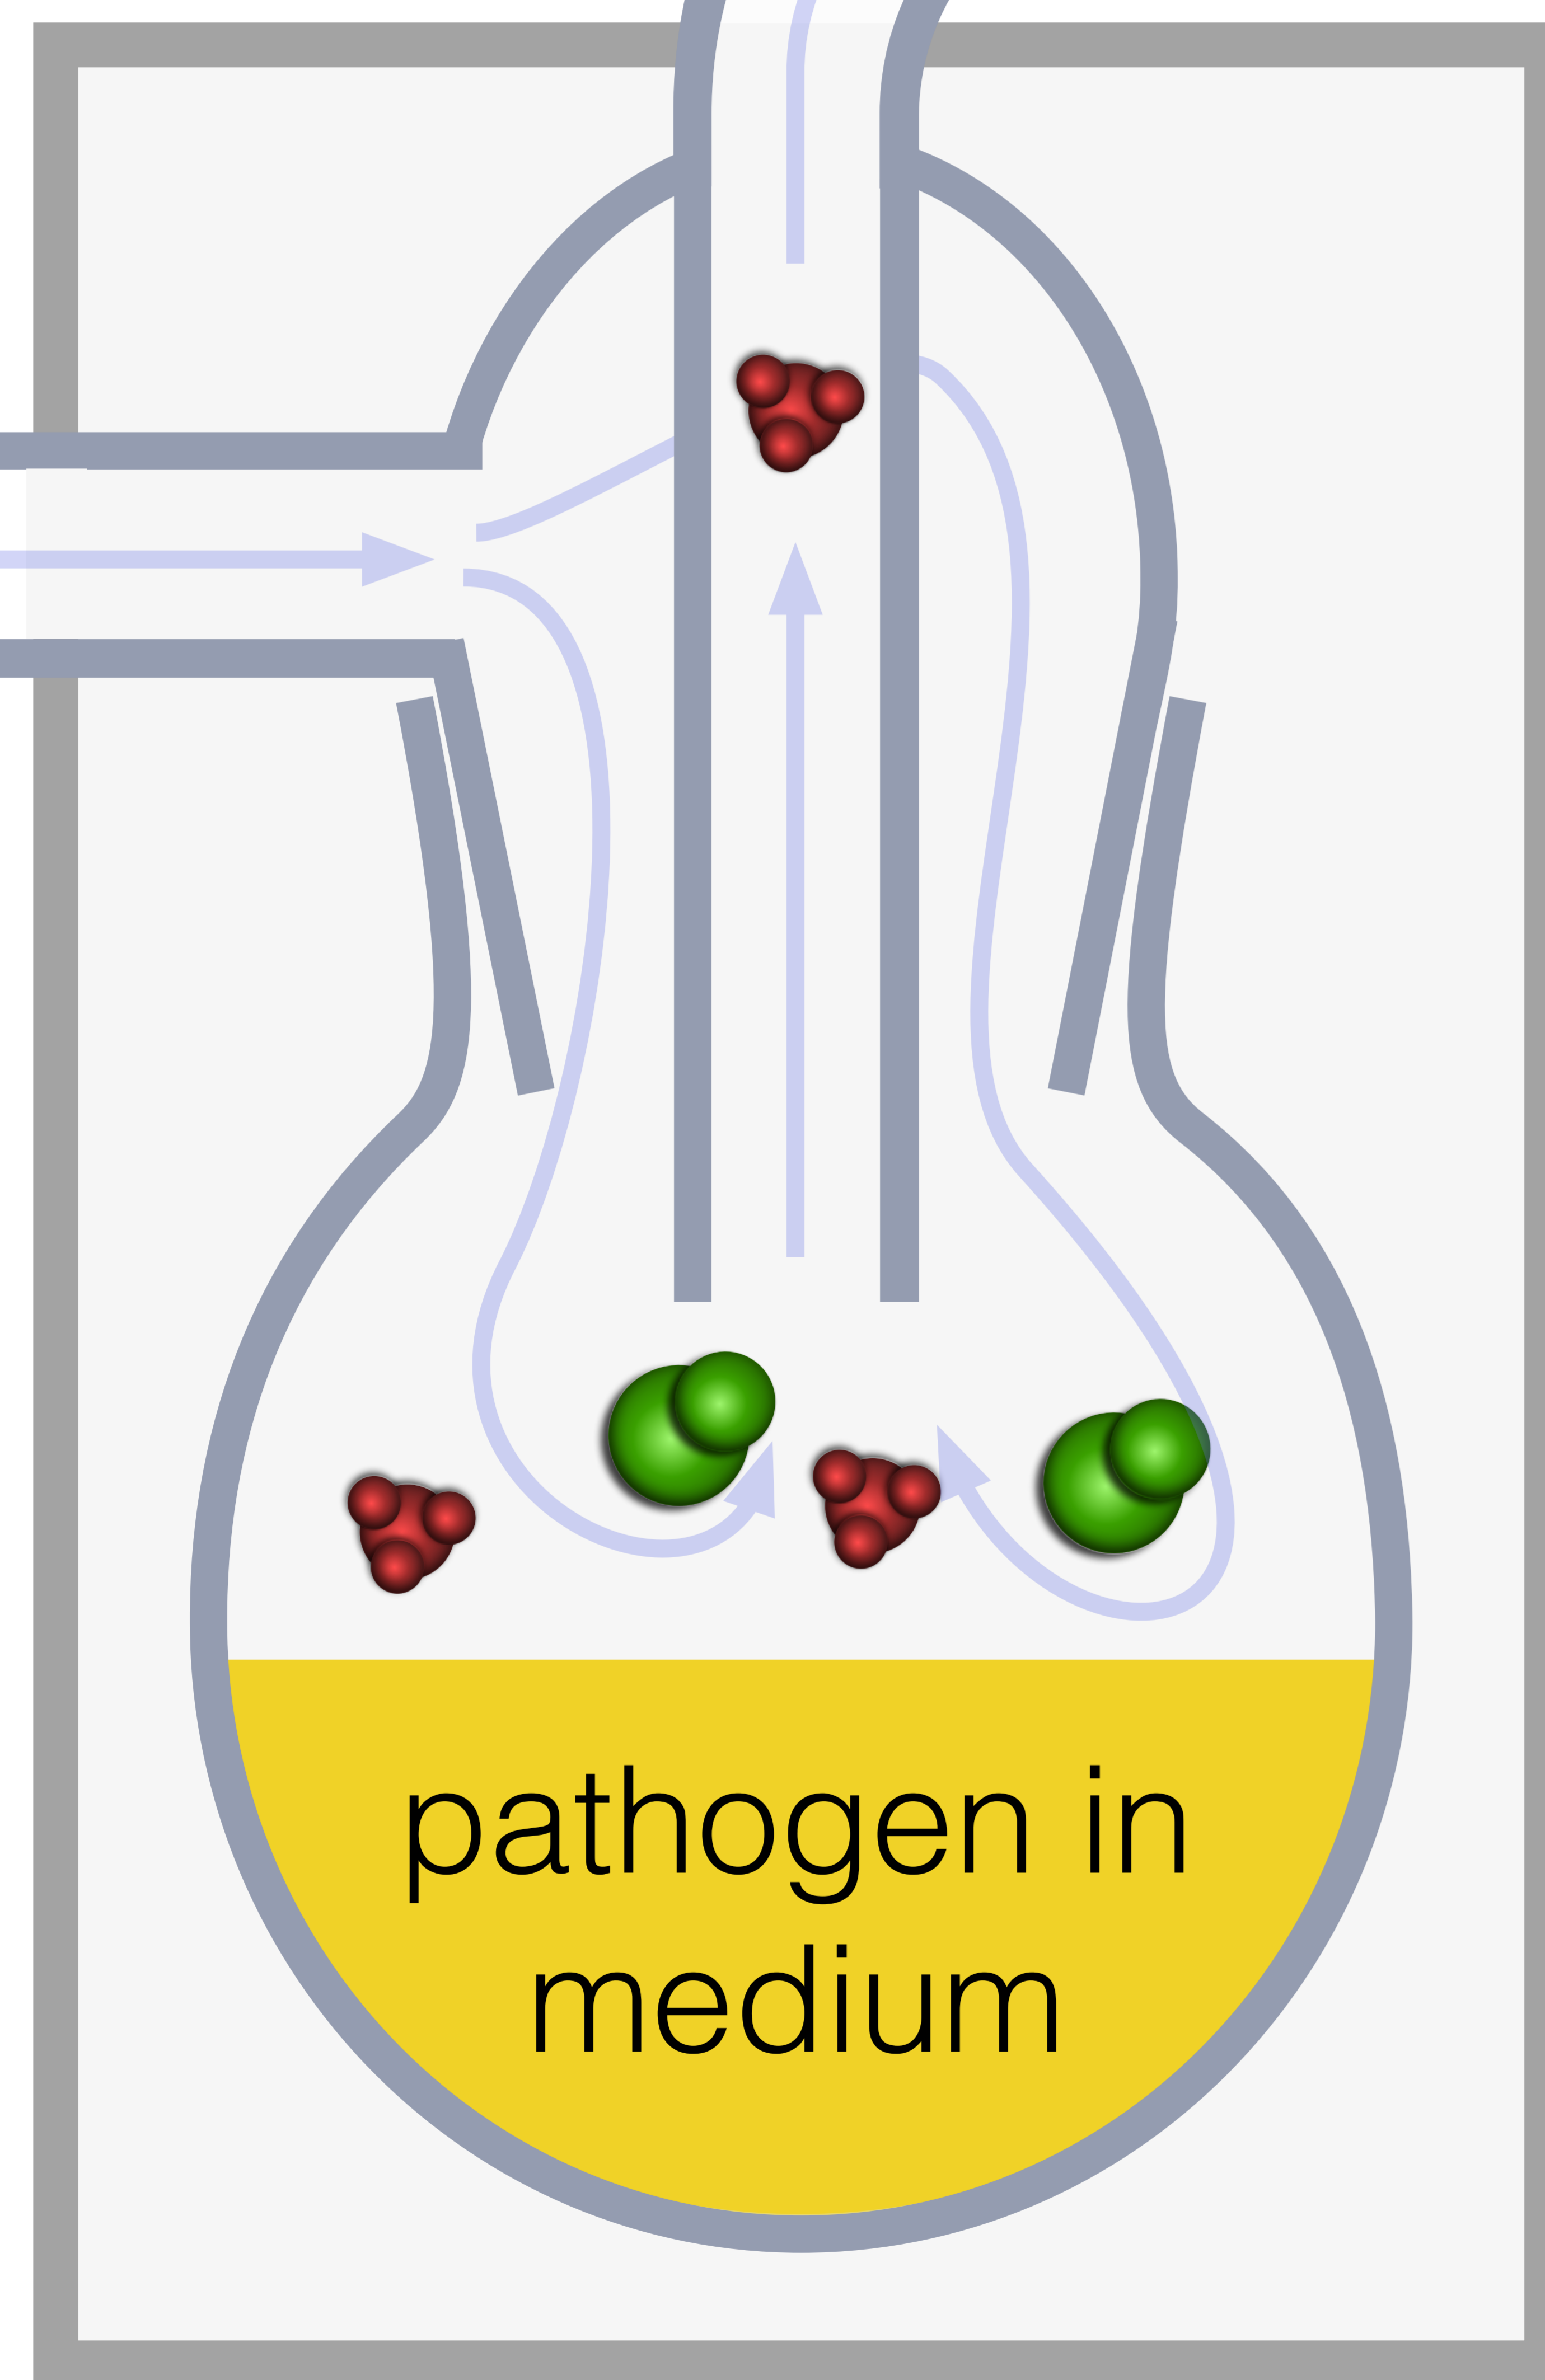

aluminum casting  
at  $T=50\text{ }^{\circ}\text{C}$

electrospray

$H_2O$   
+ 0.1% formic acid

A schematic of the electrospray source. A brown tube dips into a beaker of blue liquid labeled " $H_2O$  + 0.1% formic acid". The tube ends in a grey cone that emits a spray of small blue spheres. These spheres travel through a grey tube into the SESI source.

exhaust

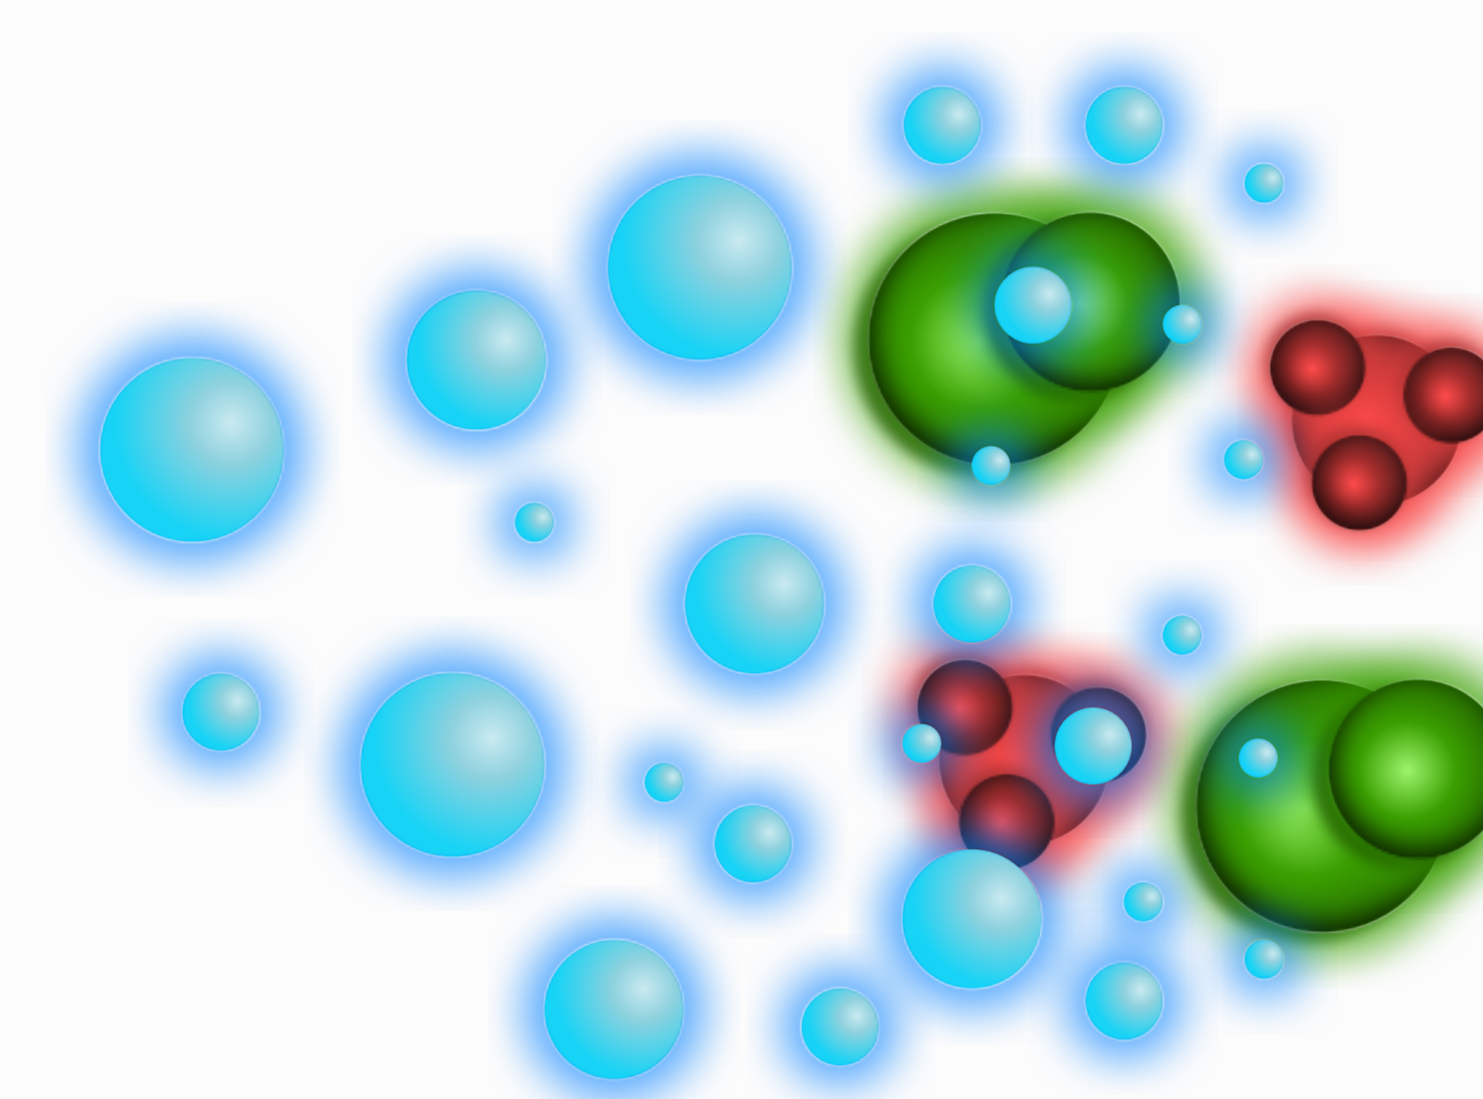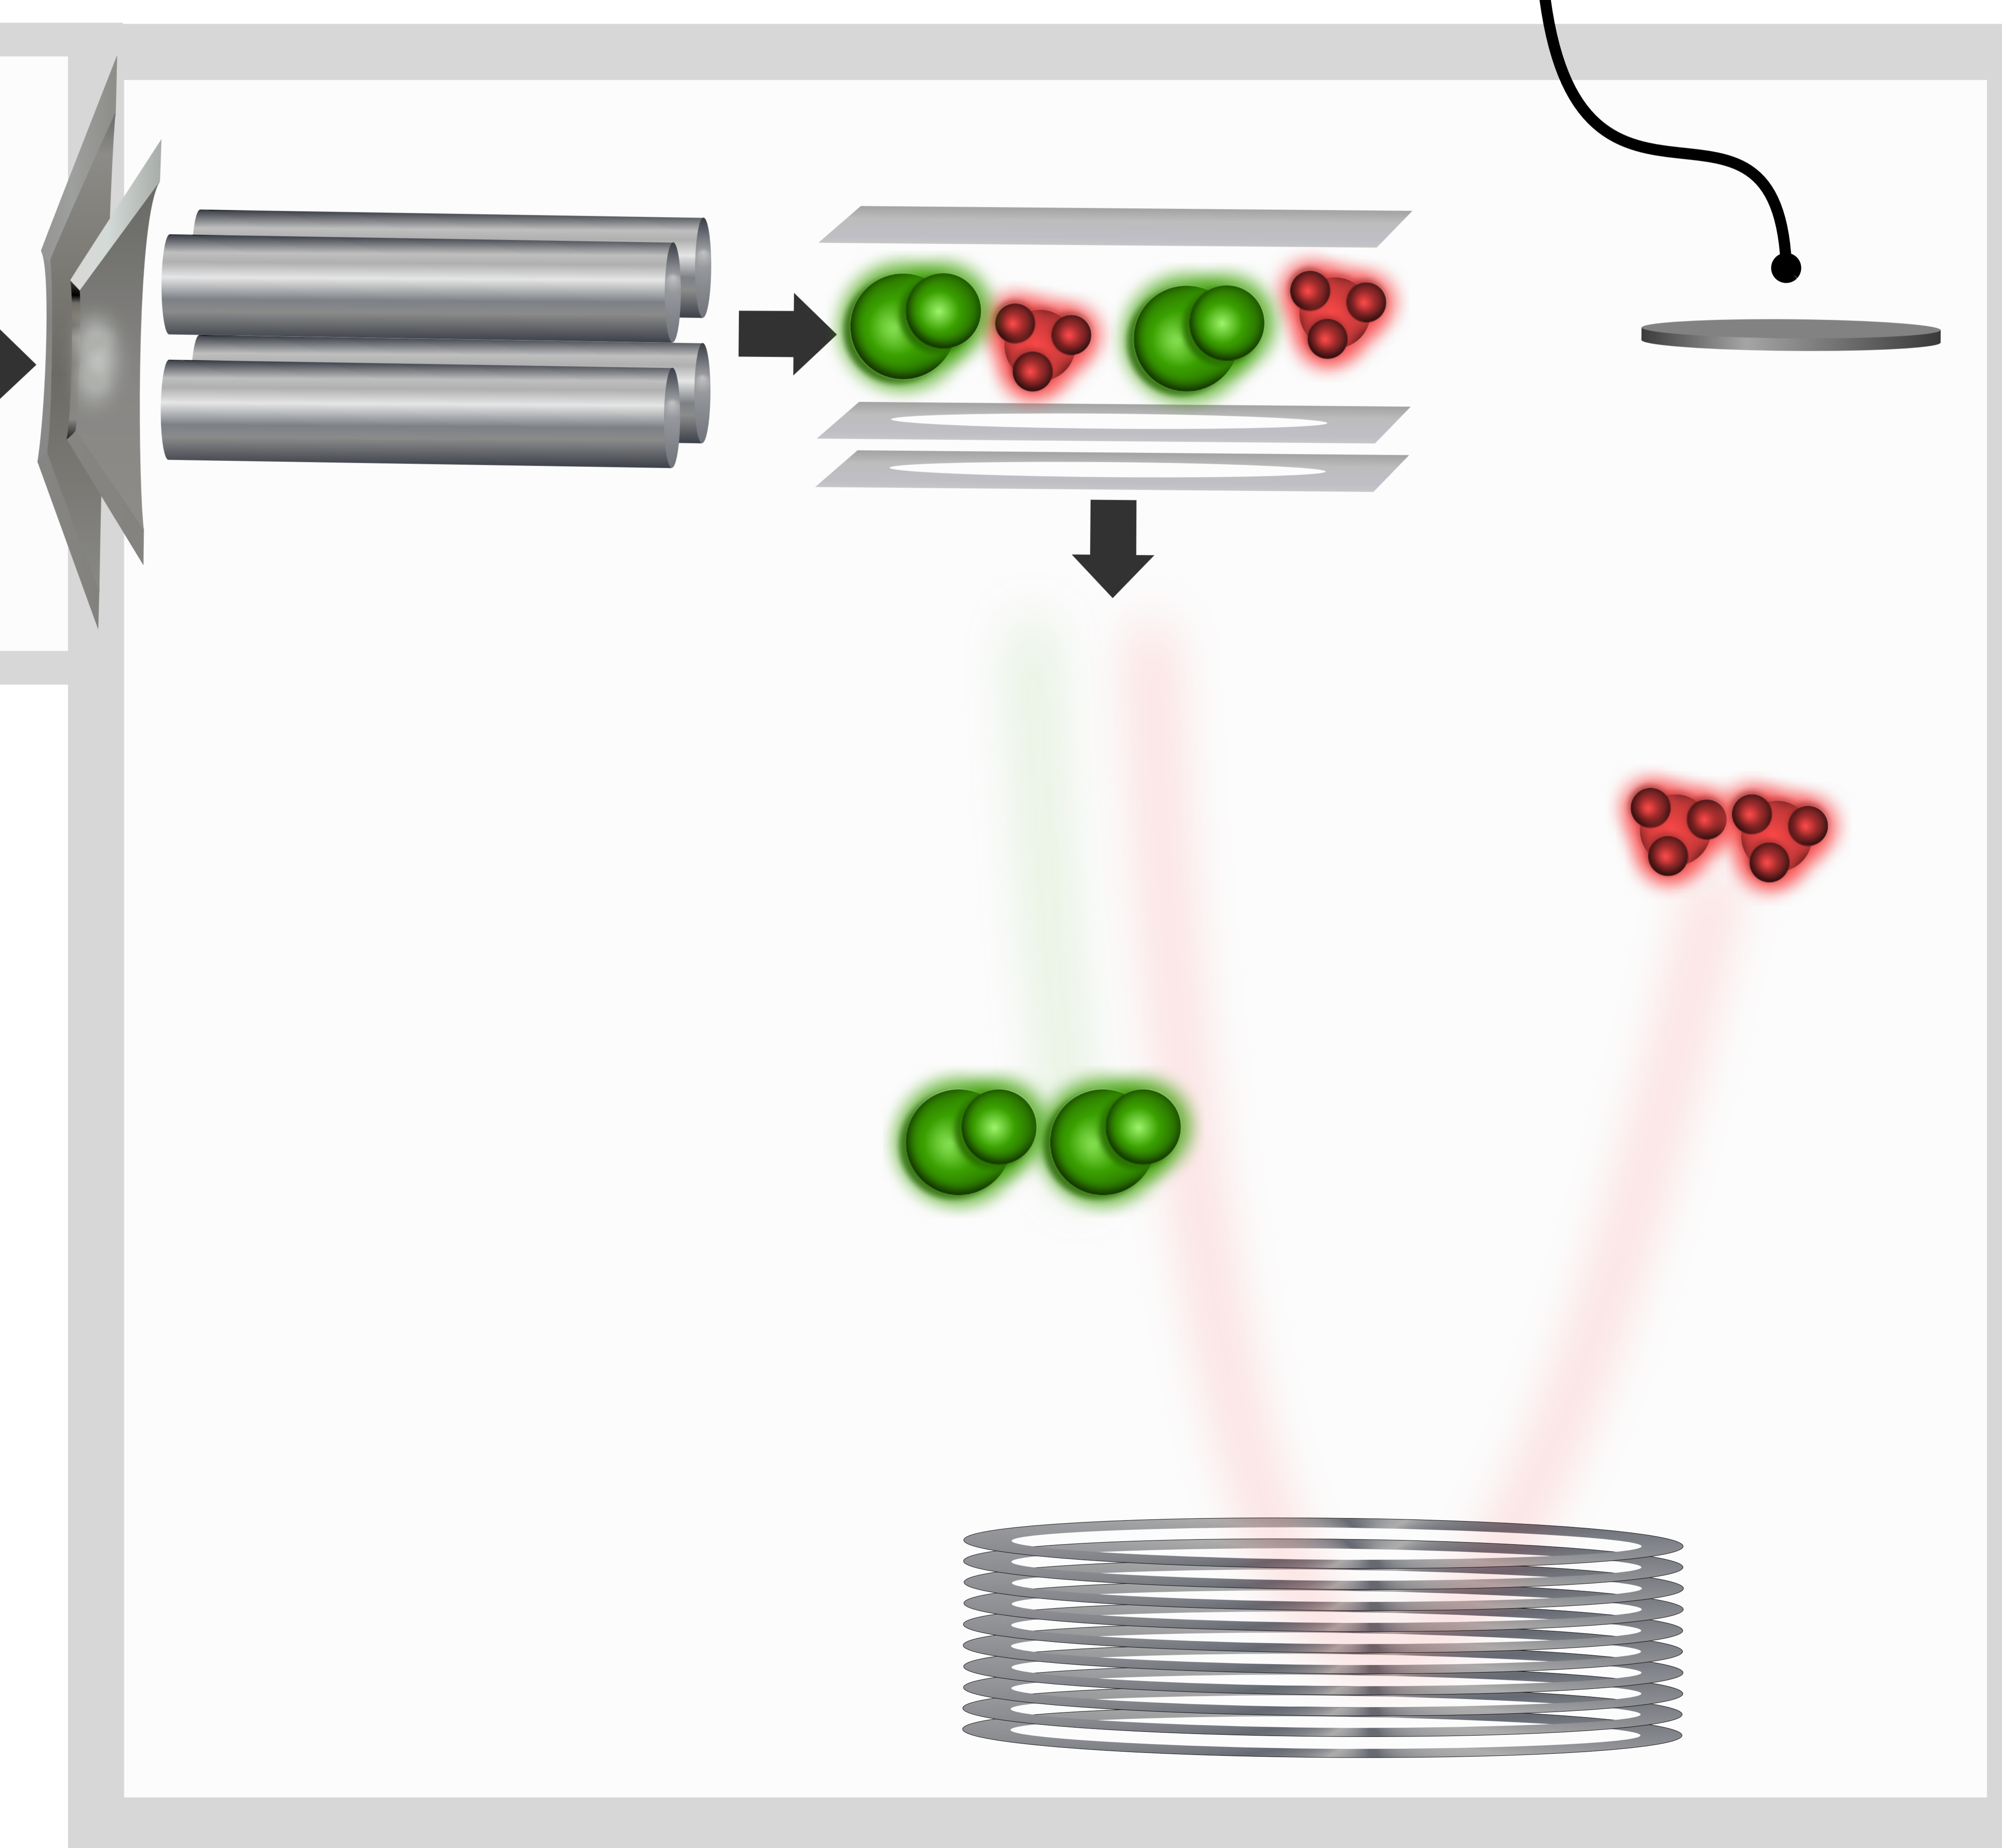

Supplement: s1 [file s1]
