# Supplementary figures and images for: Differentiation of Cystic Fibrosis-Related Pathogens by Volatile Organic Compound Analysis with Secondary Electrospray Ionization Mass Spectrometry
Source: MDPI journal article supplement (doi:10.3390/metabo11110773), 2021-11-11

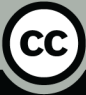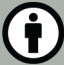

BY

Supplement: s1 [file s1]

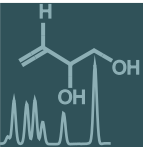

*metabolites*

Supplement: s1 [file s1]

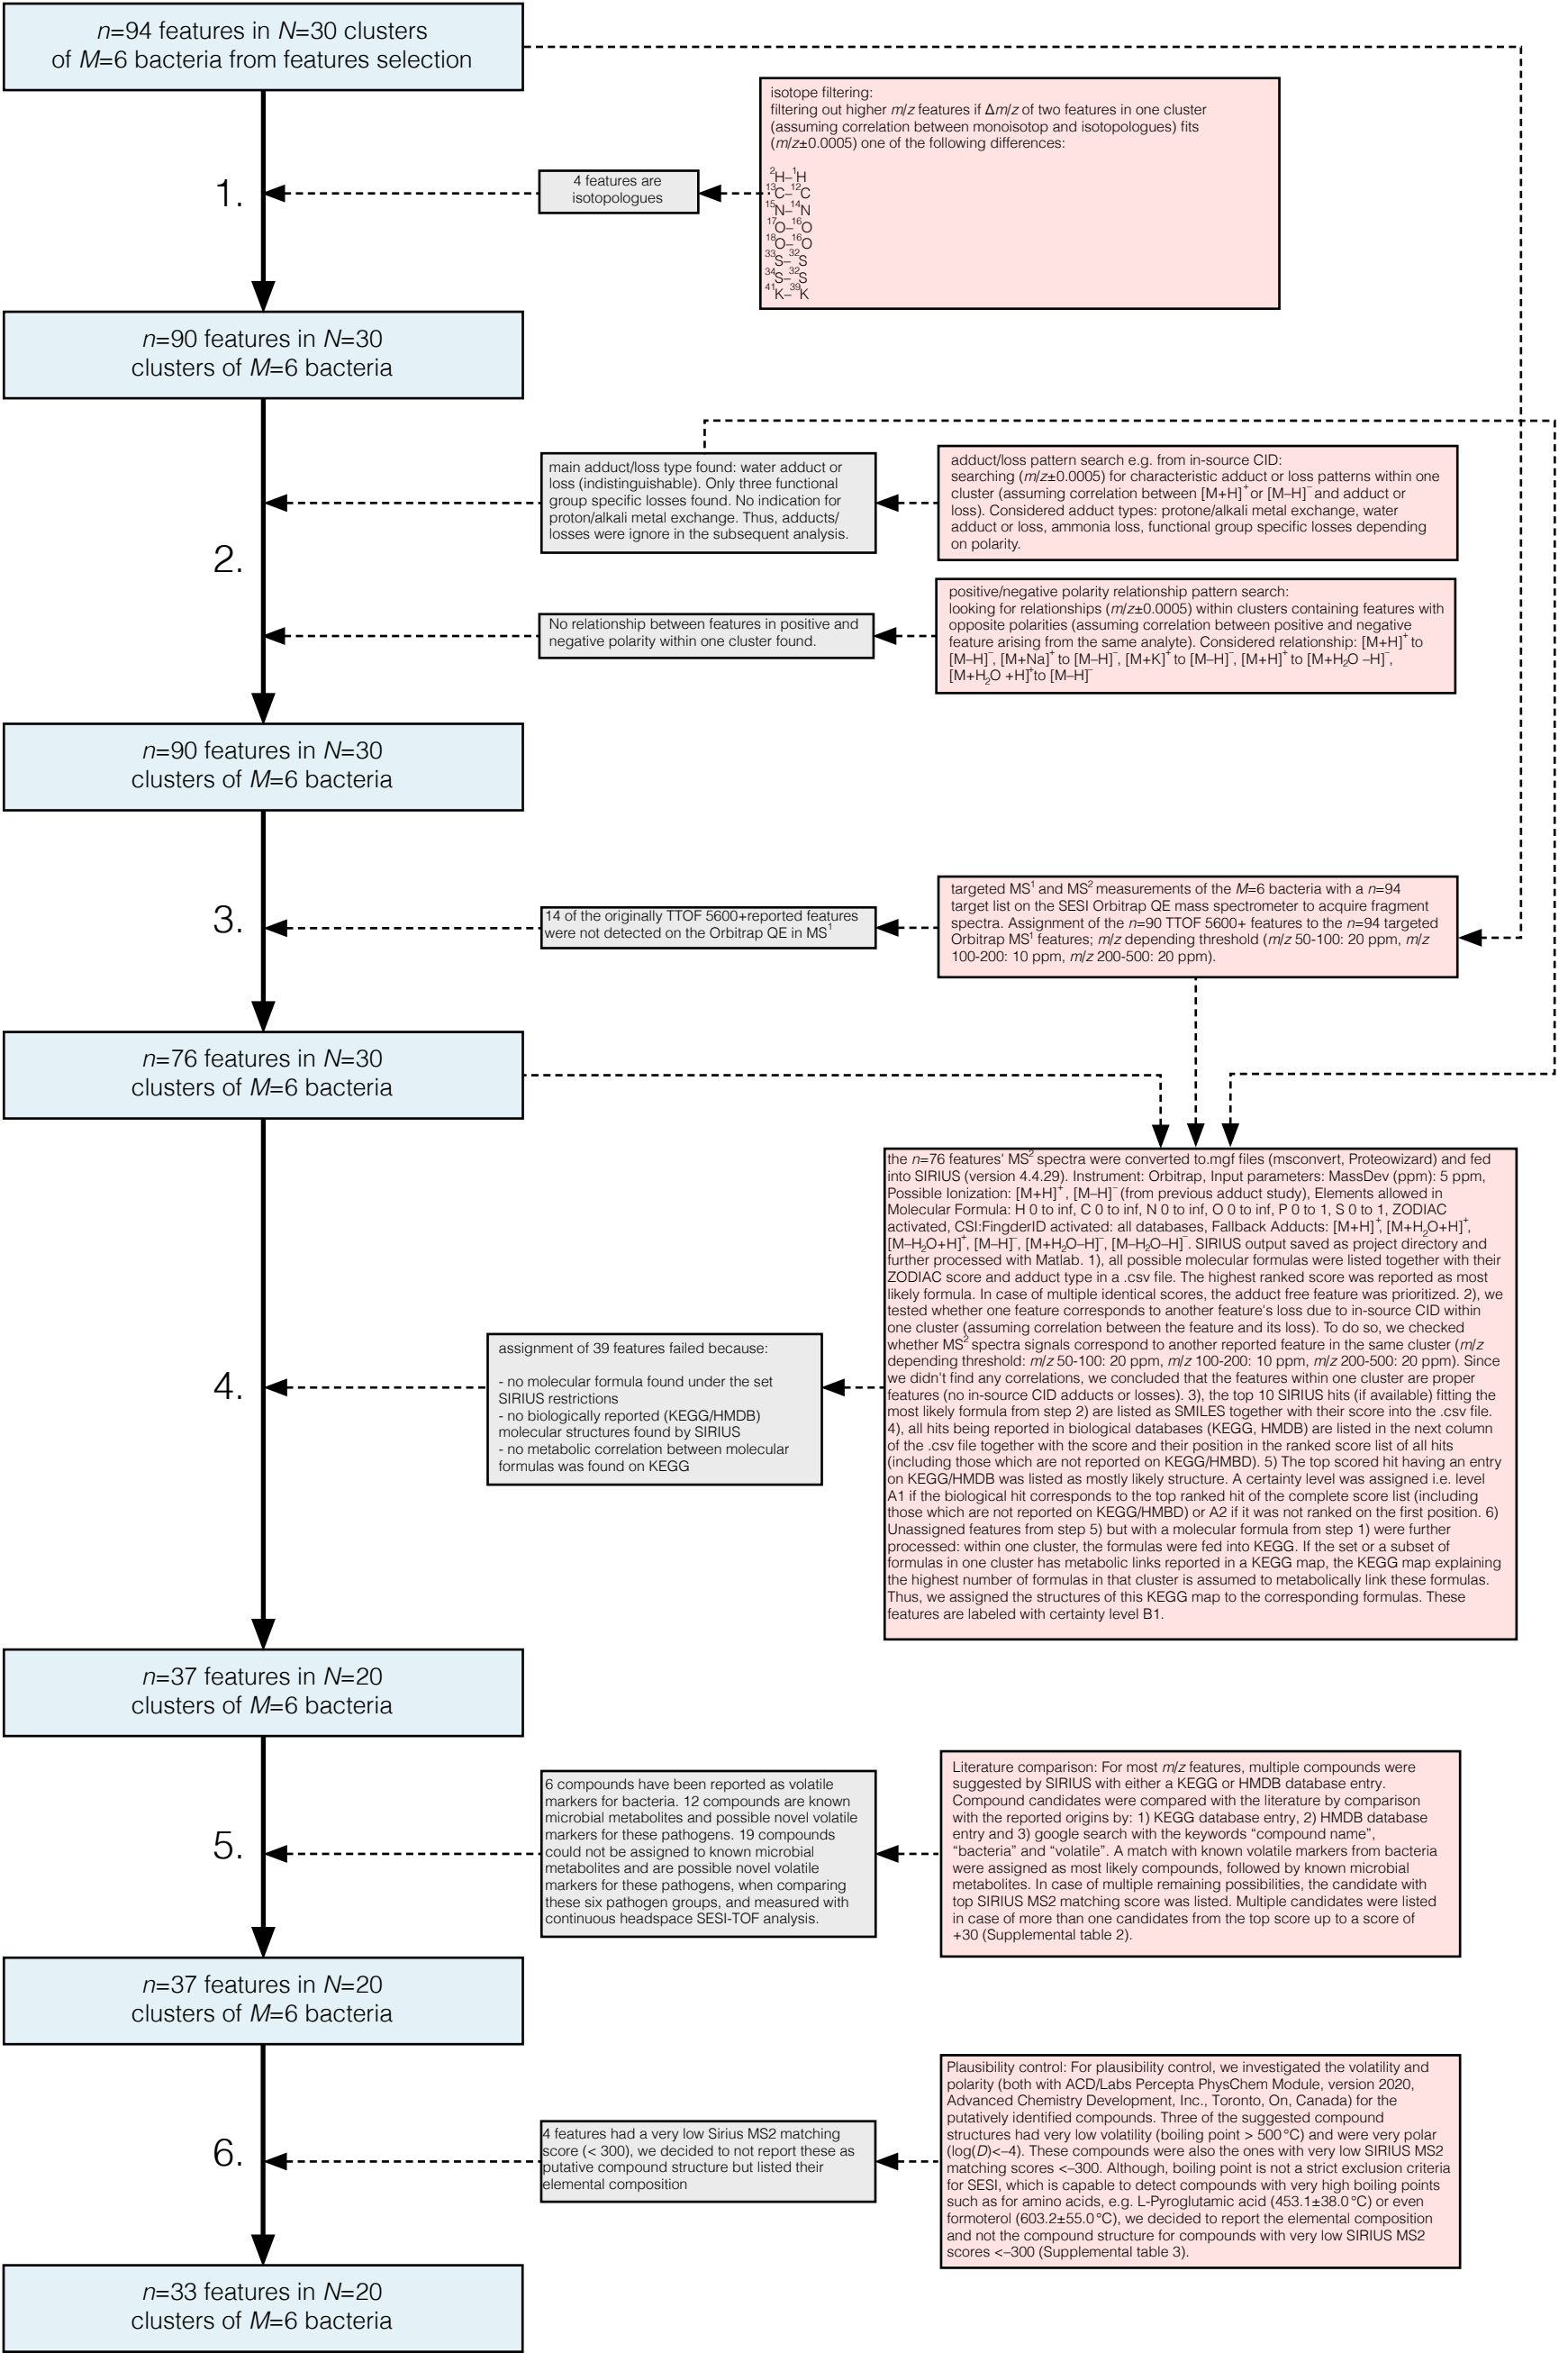

Supplement: s1 [file s1]

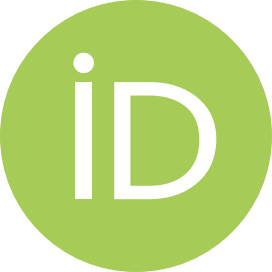

Supplement: s1 [file s1]

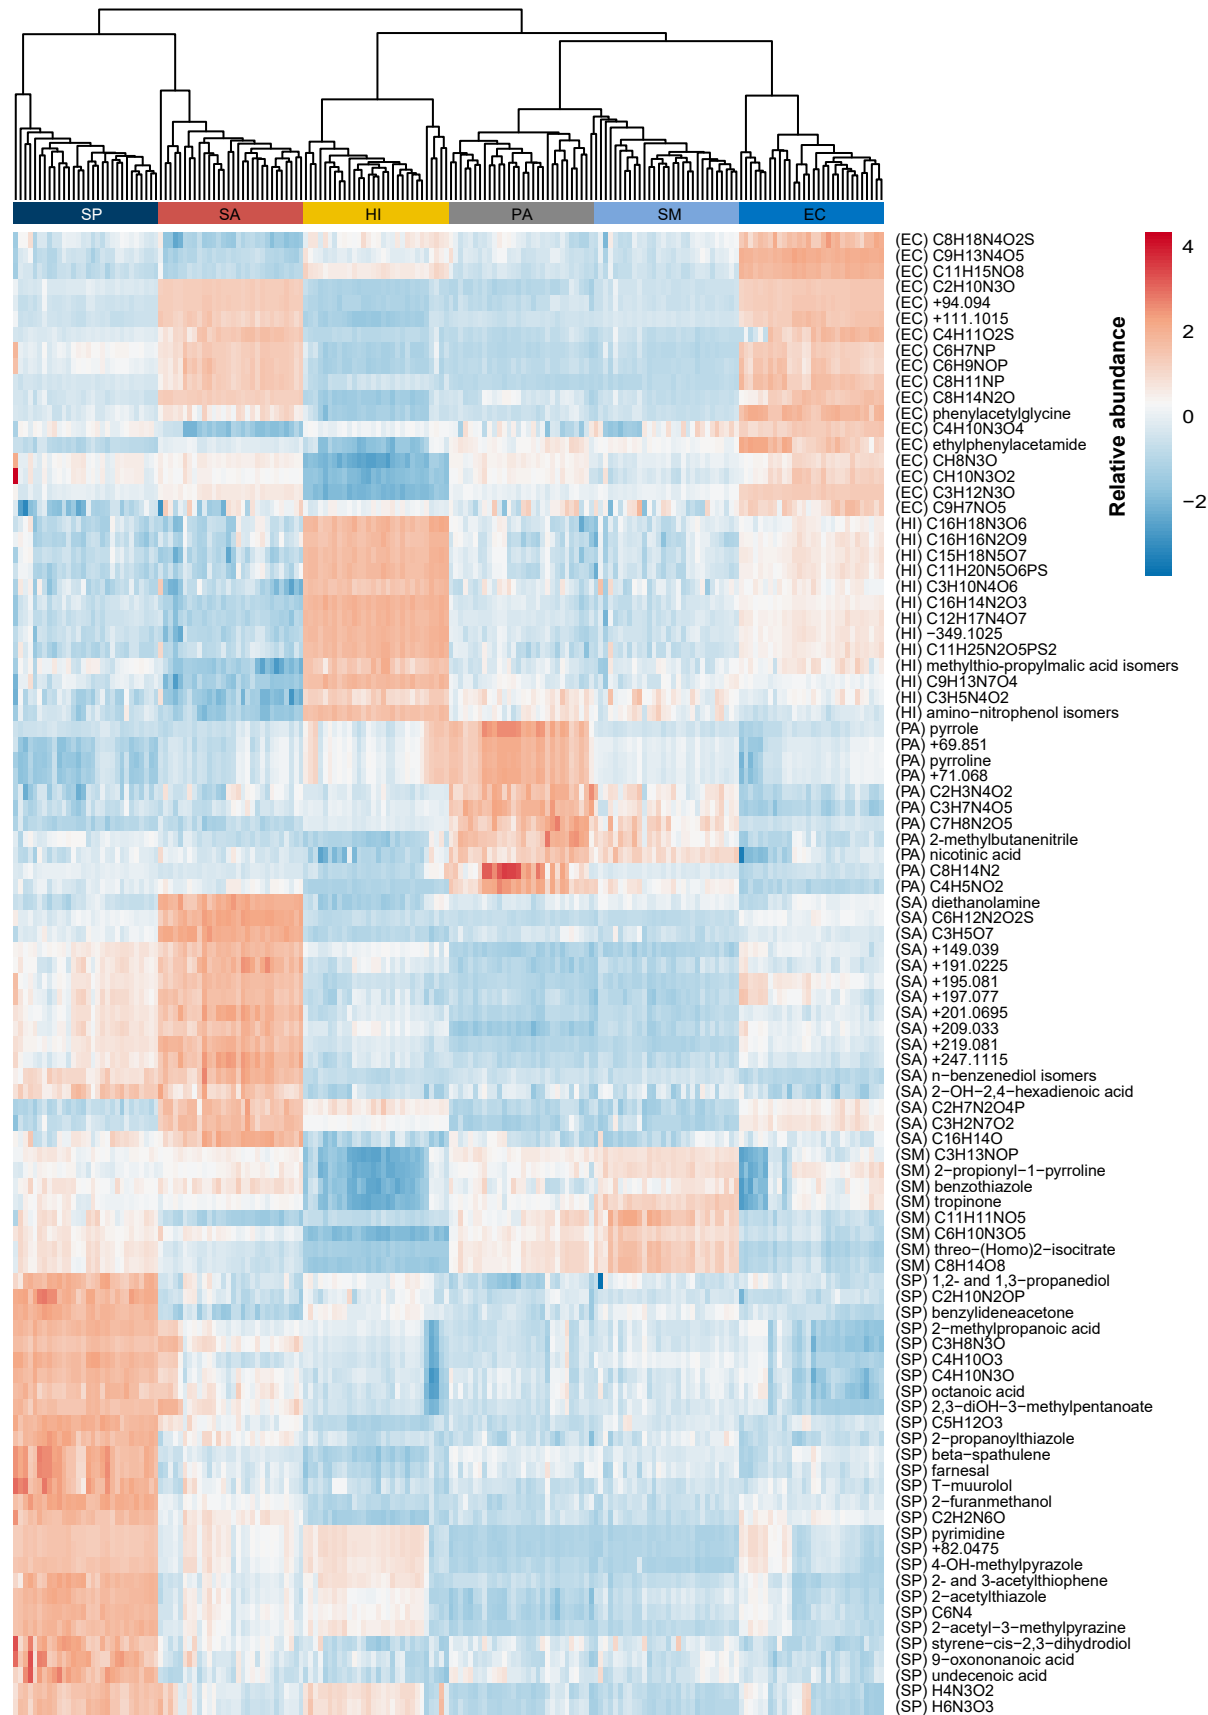

Supplement: s1 [file s1]
